# Supplementary material
Source: publisher figshare collection journal article supplement (https://acs.figshare.com/ndownloader/files/4501117)

## Supplemental Information:

**Supporting Figure 1:** Scan Rate dependency for  $[\text{Os}(\text{bpy})_2(\text{PVP})_{10}]^{2+}$  on glassy carbon electrodes, ( $\Gamma = (2 \pm 1) \times 10^{-9} \text{ mol cm}^{-2}$ ), in 0.1 M  $\text{H}_2\text{SO}_4$ ,  $100 < \nu < 500 \text{ mVs}^{-1}$ . Inserts show the Randles-Sevcik plot for the data set, after background corrections had been performed on each individual cyclic voltammograms to remove the background current.

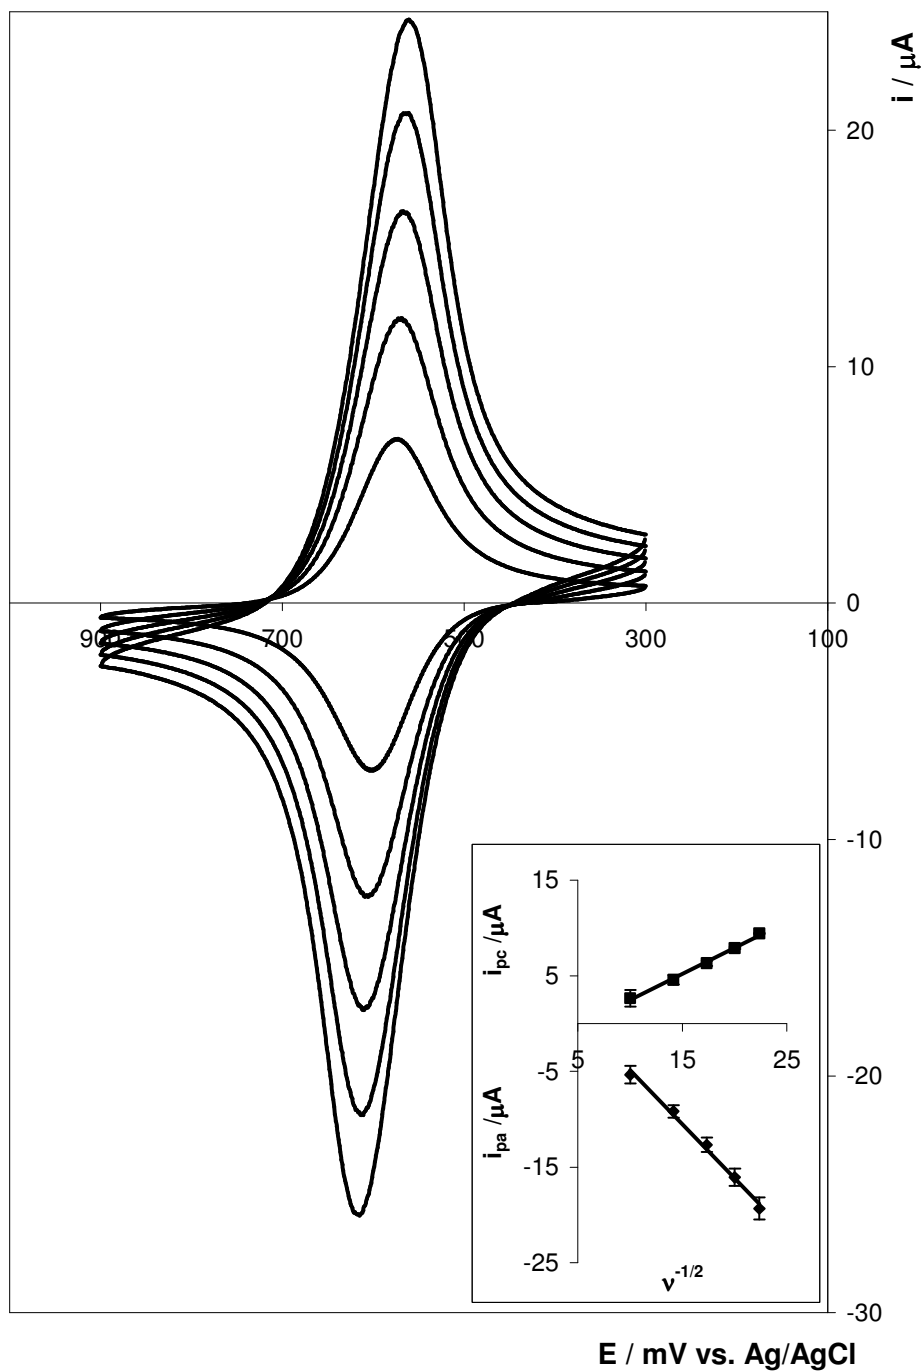

**Supporting Figure 2:** Potential dependence of current and emission intensity of (a)  $[\text{Os}(\text{bpy})_2(\text{PVP})_{10}]^{2+}$  modified electrode, (b) Os-Pani, and (c) Os-PPy composite films on glassy carbon electrodes in 0.1 M PBS solution containing 100 mM 8-oxoG (pH 5.5). Scan rate of  $100 \text{ mVs}^{-1}$ . The surface coverages were  $(2 \pm 0.7) \times 10^{-9} \text{ mol cm}^{-2}$  for the  $[\text{Os}(\text{bpy})_2(\text{PVP})_{10}]^{2+}$  film and  $(7 \pm 4) \times 10^{-9} \text{ mol cm}^{-2}$  for the Os-Pani and Os-PPy composites.

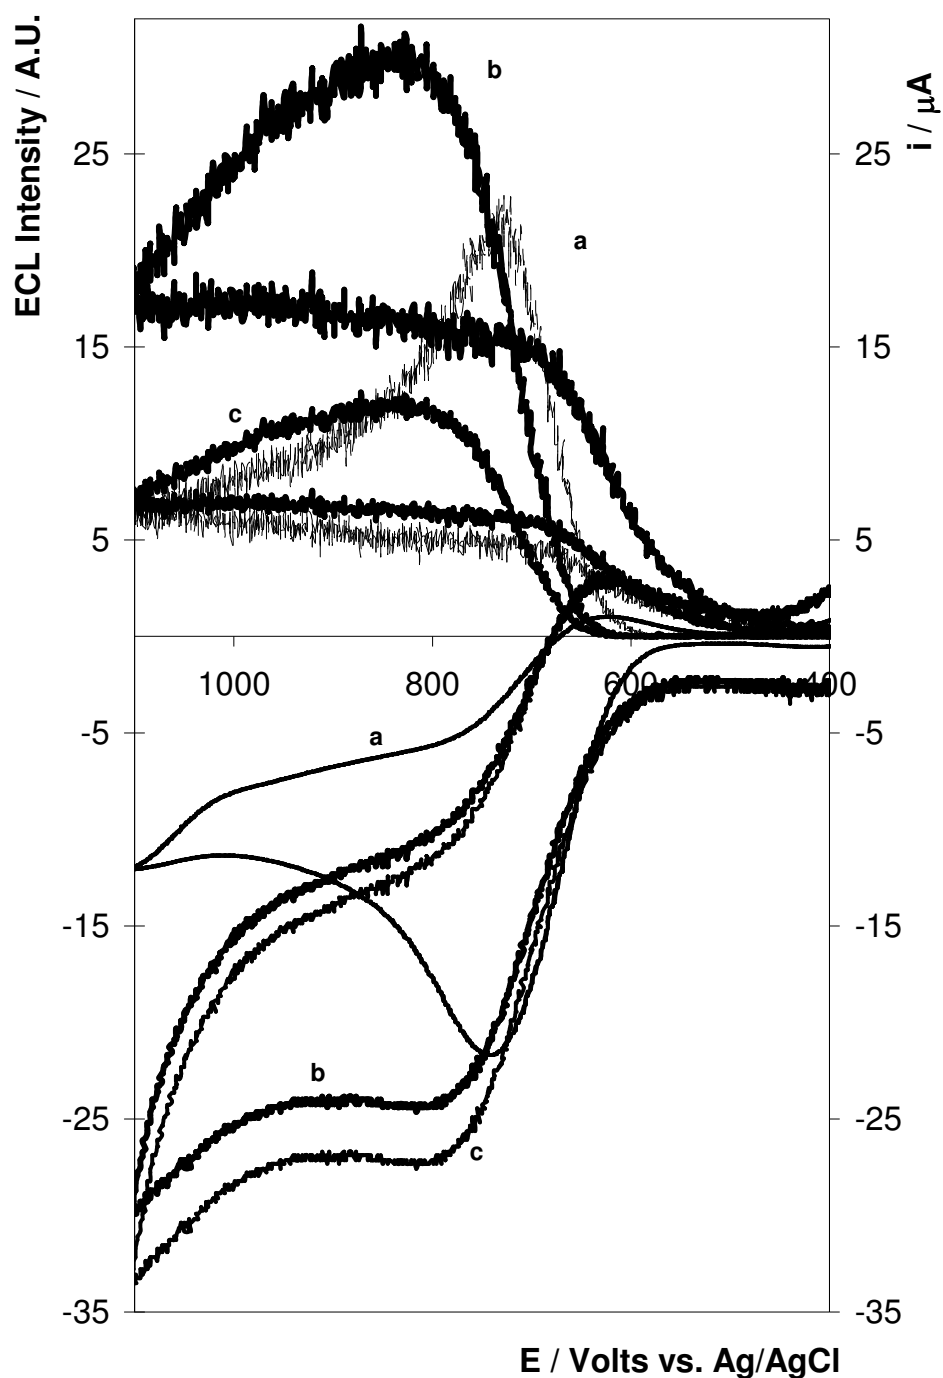

**Supporting Figure 3:** Cyclic voltammogram of a  $[\text{Os}(\text{bpy})_2(\text{PVP})_{10}]^{2+}$  modified electrode on an ITO electrode in 0.1 M PBS solution (pH 5.5). Scan rate of  $100 \text{ mVs}^{-1}$ . The surface coverages were  $(2 \pm 0.7) \times 10^{-9} \text{ mol cm}^{-2}$  for the  $[\text{Os}(\text{bpy})_2(\text{PVP})_{10}]^{2+}$ .

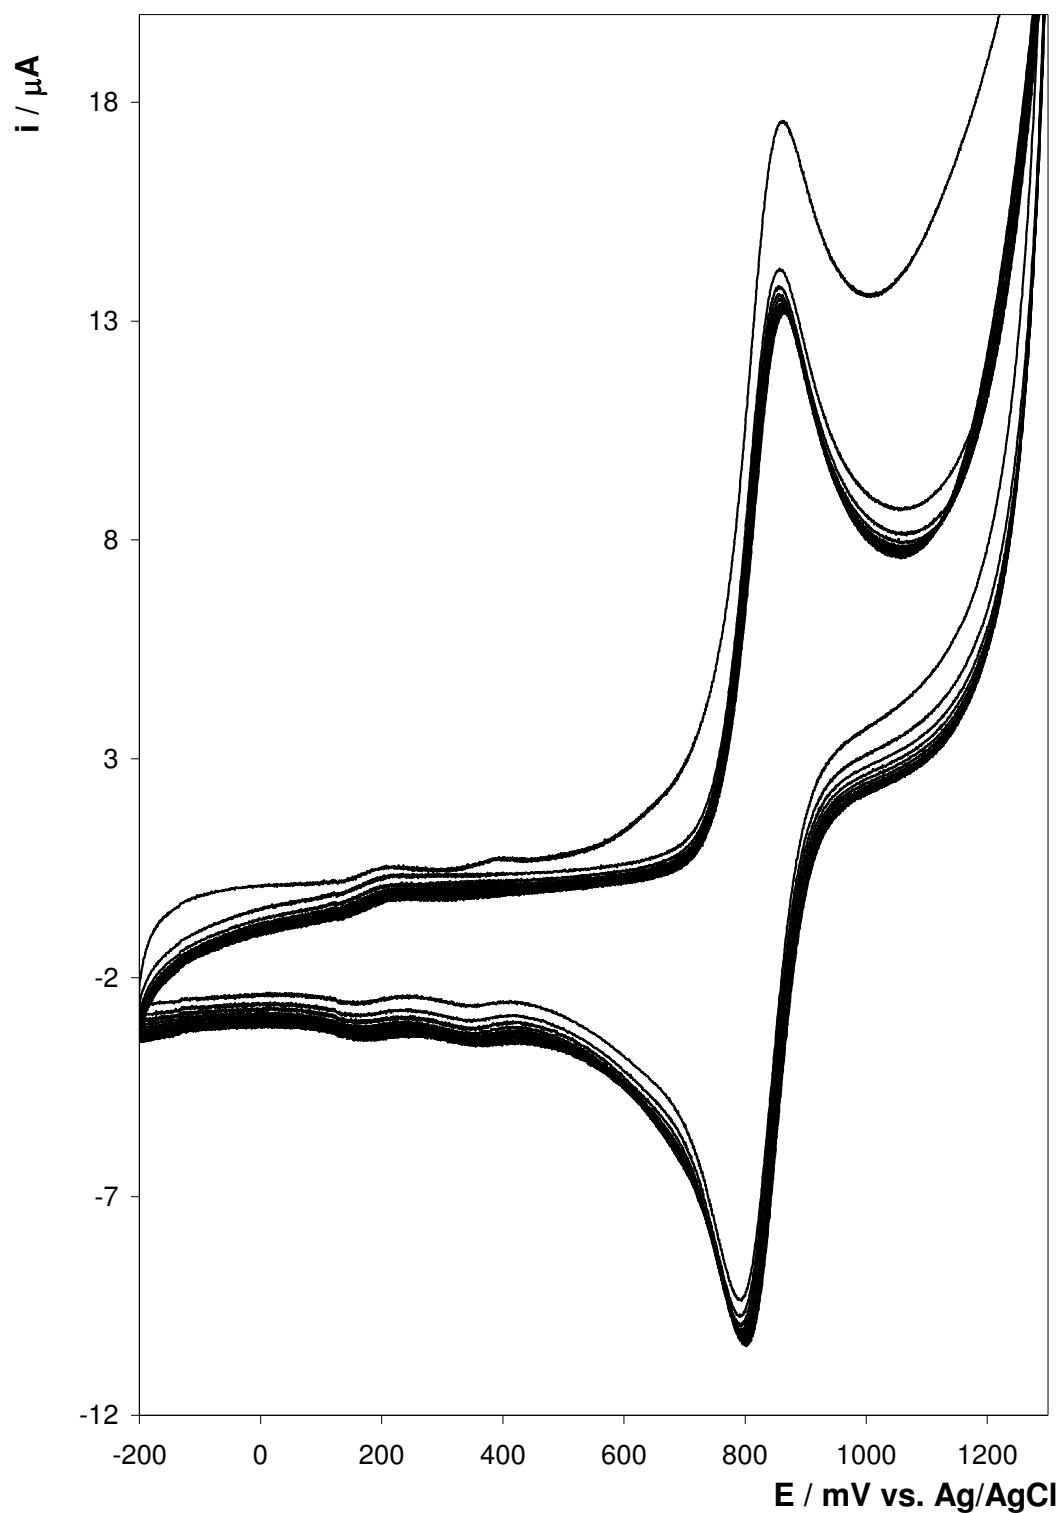

Supplement: Supplementary file 1 [file 4501117]
